# Supplementary figures and images for: Studying the Genetics of Complex Disease With Ancestry‐Specific Human Phenotype Networks: The Case of Type 2 Diabetes in East Asian Populations
Source: PubMed Central journal article supplement — Genet Epidemiol. 2016 Apr 7;40(4):293–303. doi: 10.1002/gepi.21964 (PMC5071667; doi:10.1002/gepi.21964), 2016-04-07

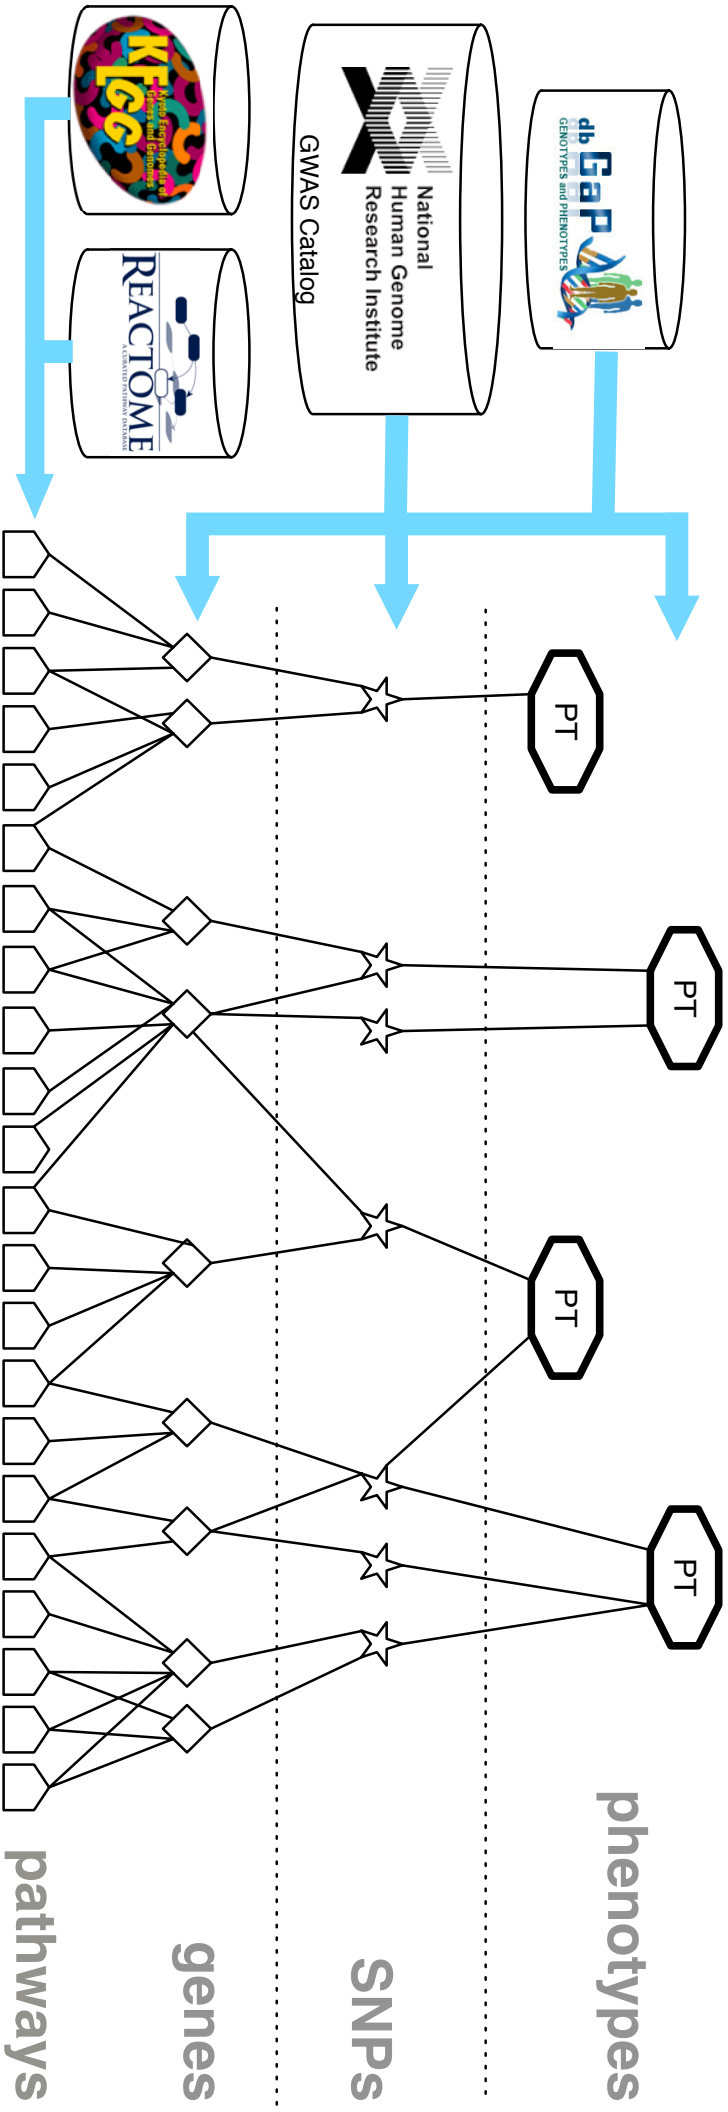

Supplement: GEPI-40-293-s001.pdf [file GEPI-40-293-s001.pdf]

# Pathway-based

HPN

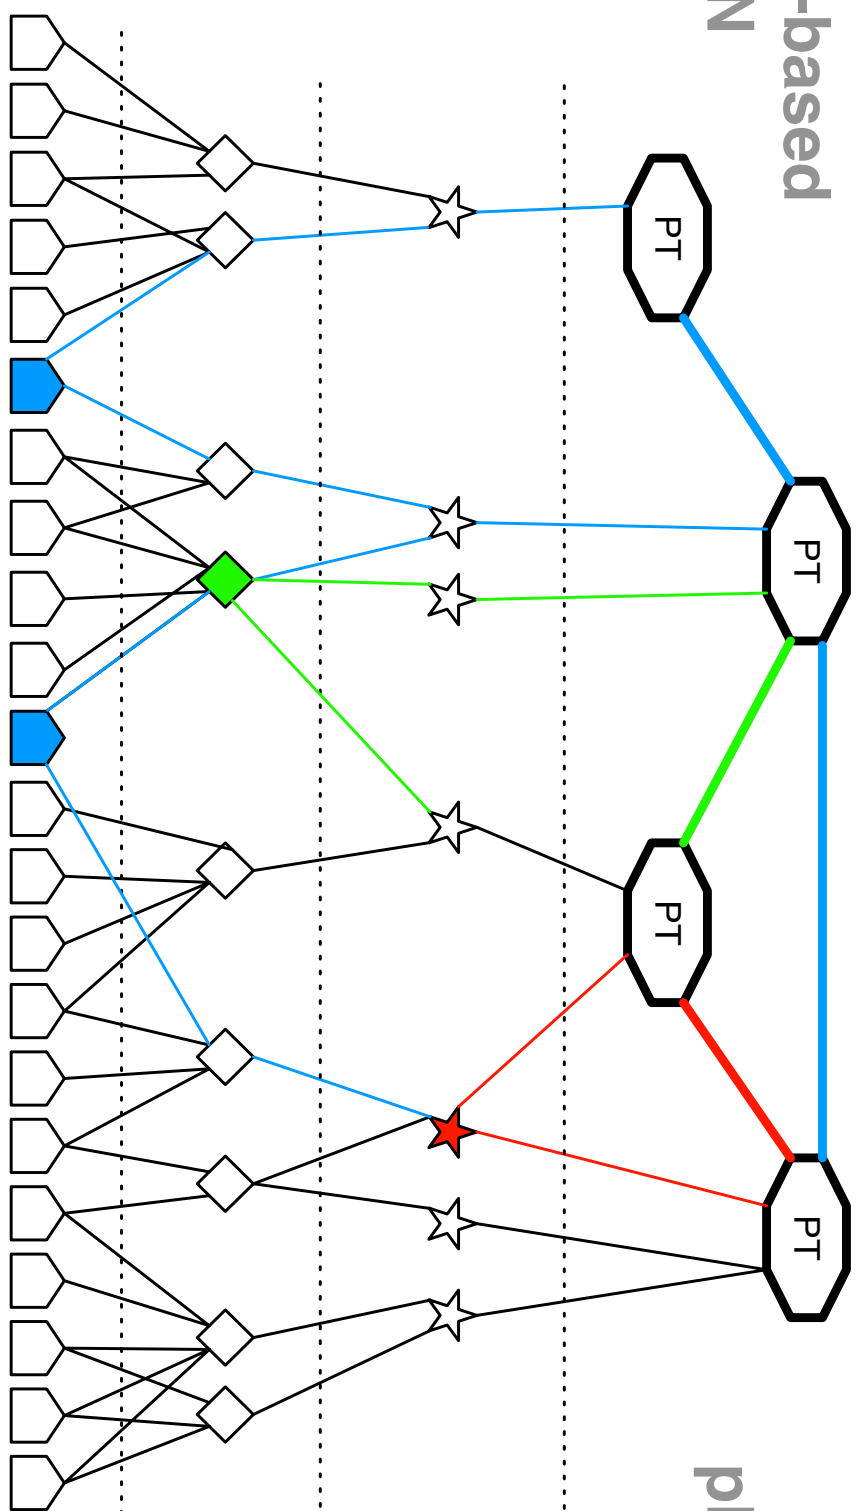

phenotypes

SNPs

genes

pathways

Supplement: GEPI-40-293-s002.pdf [file GEPI-40-293-s002.pdf]
